# Supplementary material for: Organic matter loading by hippopotami causes subsidy overload resulting in downstream hypoxia and fish kills
Source: Springer Nature journal article supplement (doi:10.1038/s41467-018-04391-6), 2018-05-10
Supplement: 41467_2018_4391_MOESM1_ESM.pdf [file 41467_2018_4391_MOESM1_ESM.pdf]

## **Supplementary Materials**

Organic matter loading by hippopotami causes subsidy overload  
resulting in downstream hypoxia and fish kills

Dutton et al.

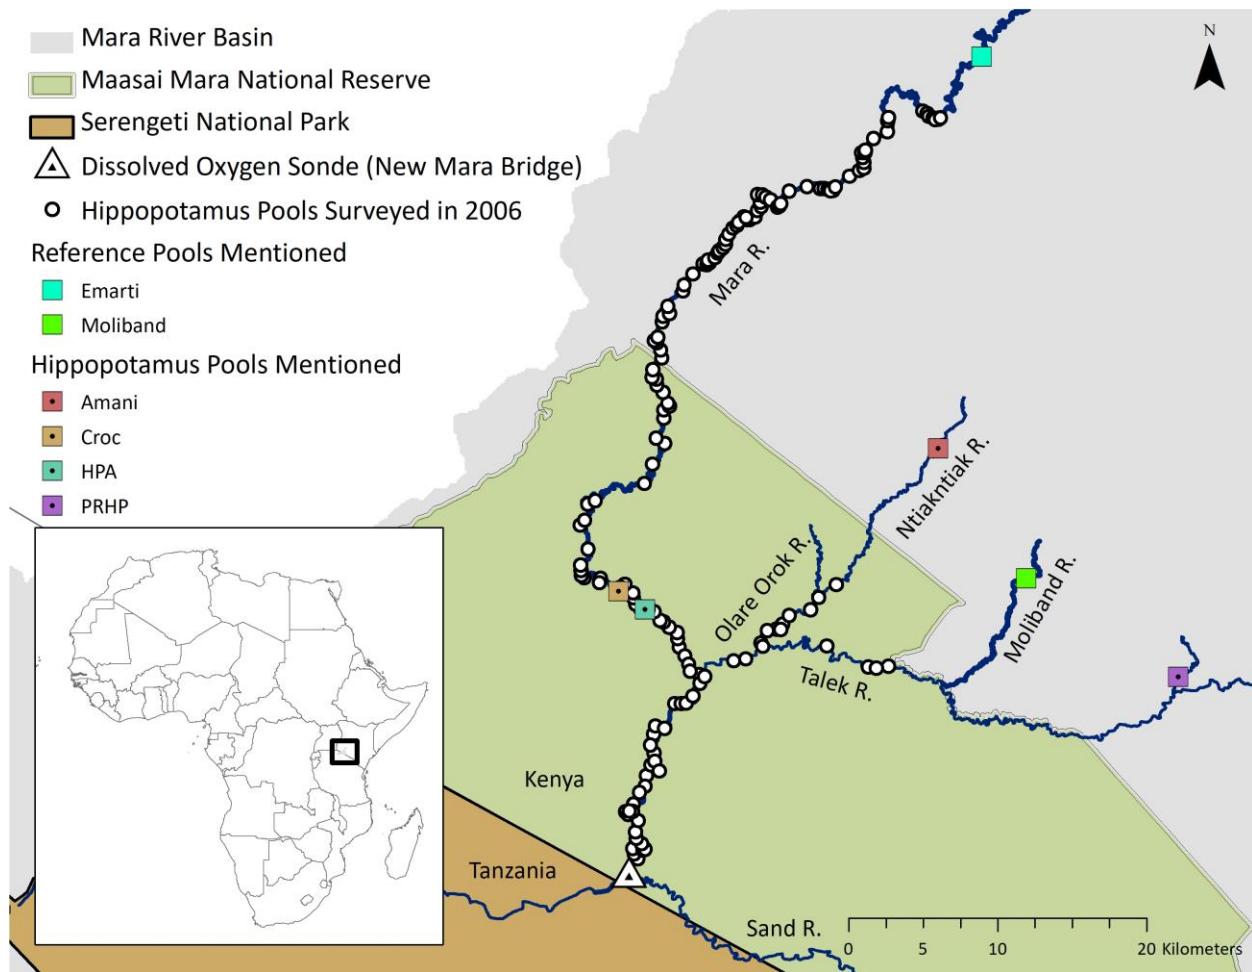

### Supplementary Figure 1.

Map of the study area showing the relationship of hippo pools surveyed in 2006<sup>1</sup>, the dissolved oxygen sonde at New Mara Bridge and the hippo pools and reference pools used as part of this study. Map was created in ArcMap 10.2.2 (ESRI, Redlands, CA, USA).

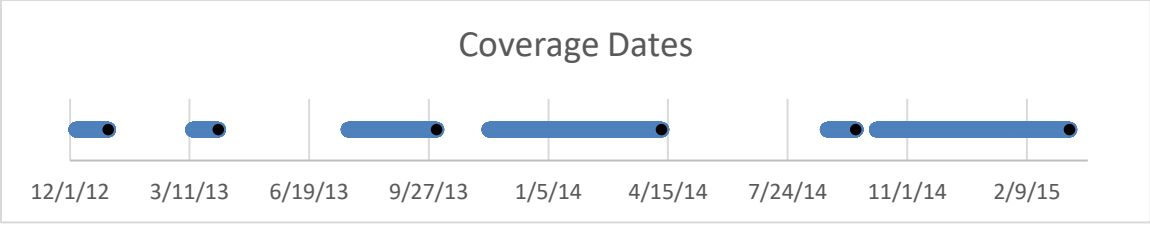

**Supplementary Figure 2.**  
Coverage dates for the dissolved oxygen loggers.

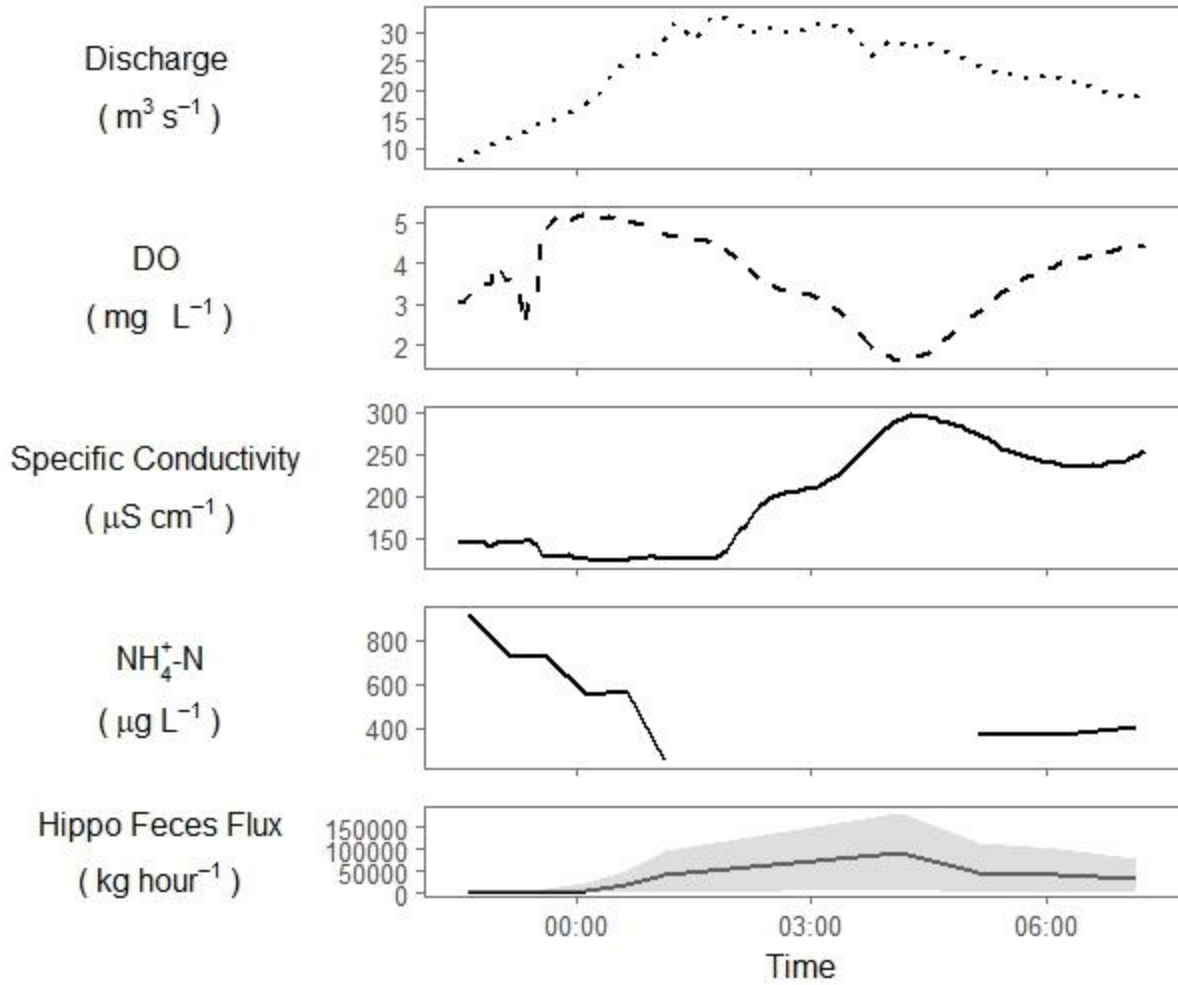

**Supplementary Figure 3.**

Discharge, dissolved oxygen (DO) concentrations, specific conductivity,  $\text{NH}_4^+\text{-N}$  and the flux of hippopotamus feces (estimated by sediment fingerprinting) for the flood on October 27-28 2012. Bayesian 95% credibility intervals for the flux of hippopotamus feces is in grey. A gap in the line for  $\text{NH}_4^+\text{-N}$  indicates missing data.

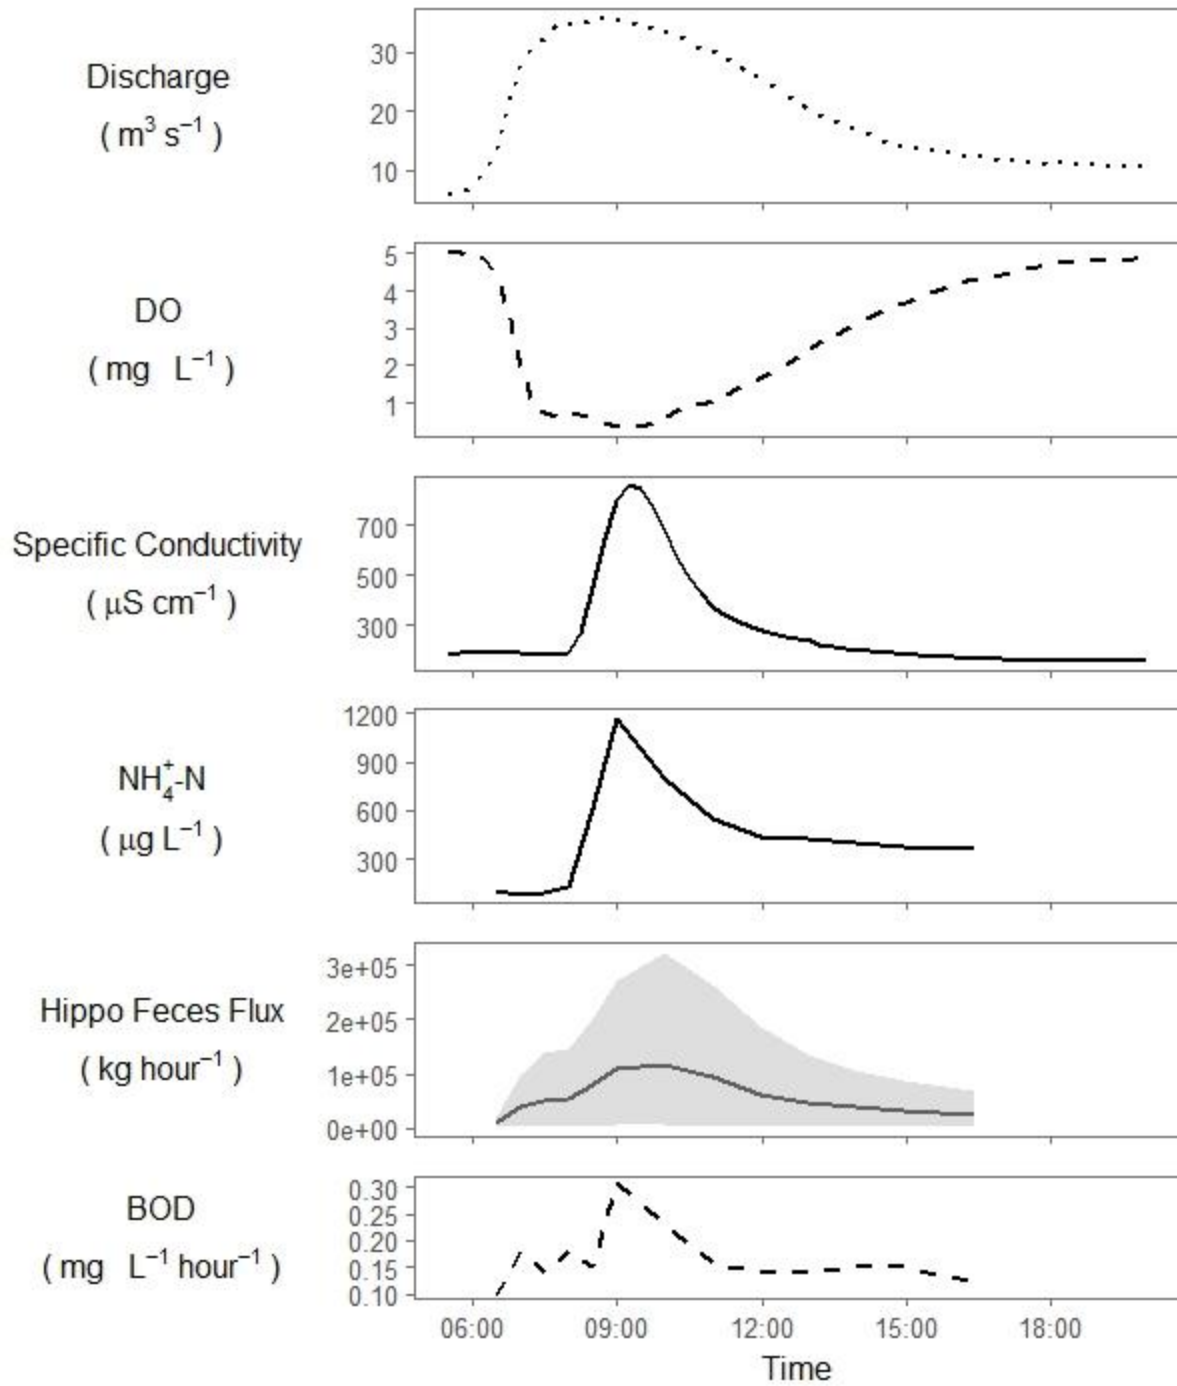

**Supplementary Figure 4.**

Discharge, dissolved oxygen (DO) concentrations, specific conductivity,  $\text{NH}_4^+\text{-N}$ , hippopotamus feces fluxes (estimated by sediment fingerprinting), and biochemical oxygen demand (BOD) for the flood on December 10, 2013. Bayesian 95% credibility intervals for the flux of hippopotamus feces is in grey.

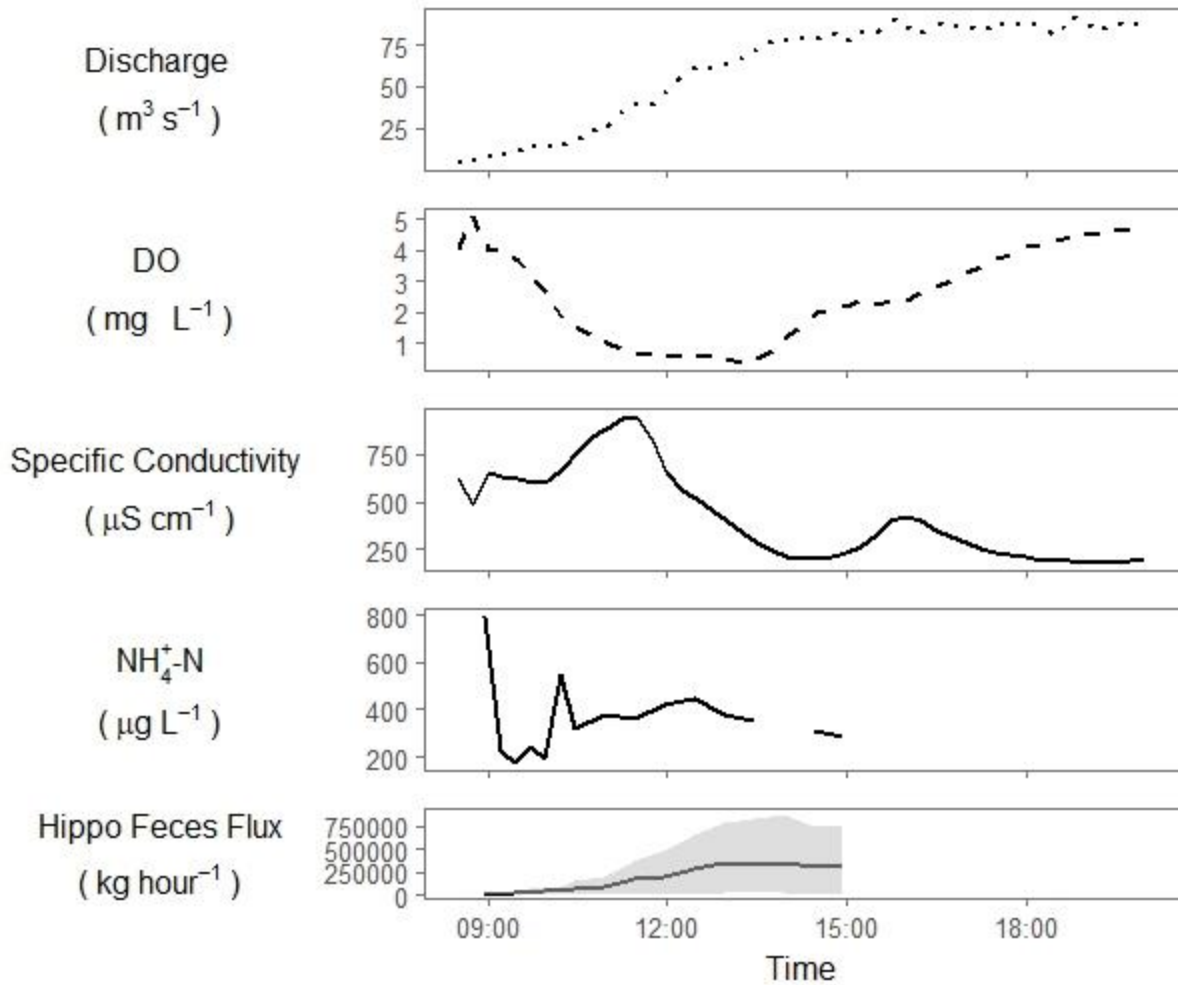

**Supplementary Figure 5.**

Discharge, dissolved oxygen (DO) concentrations, specific conductivity,  $\text{NH}_4^+\text{-N}$ , and hippopotamus feces fluxes (estimated by sediment fingerprinting) for the flood on March 14, 2014. Bayesian 95% credibility intervals for the flux of hippopotamus feces is in grey. A gap in the line for  $\text{NH}_4^+\text{-N}$  indicates missing data.

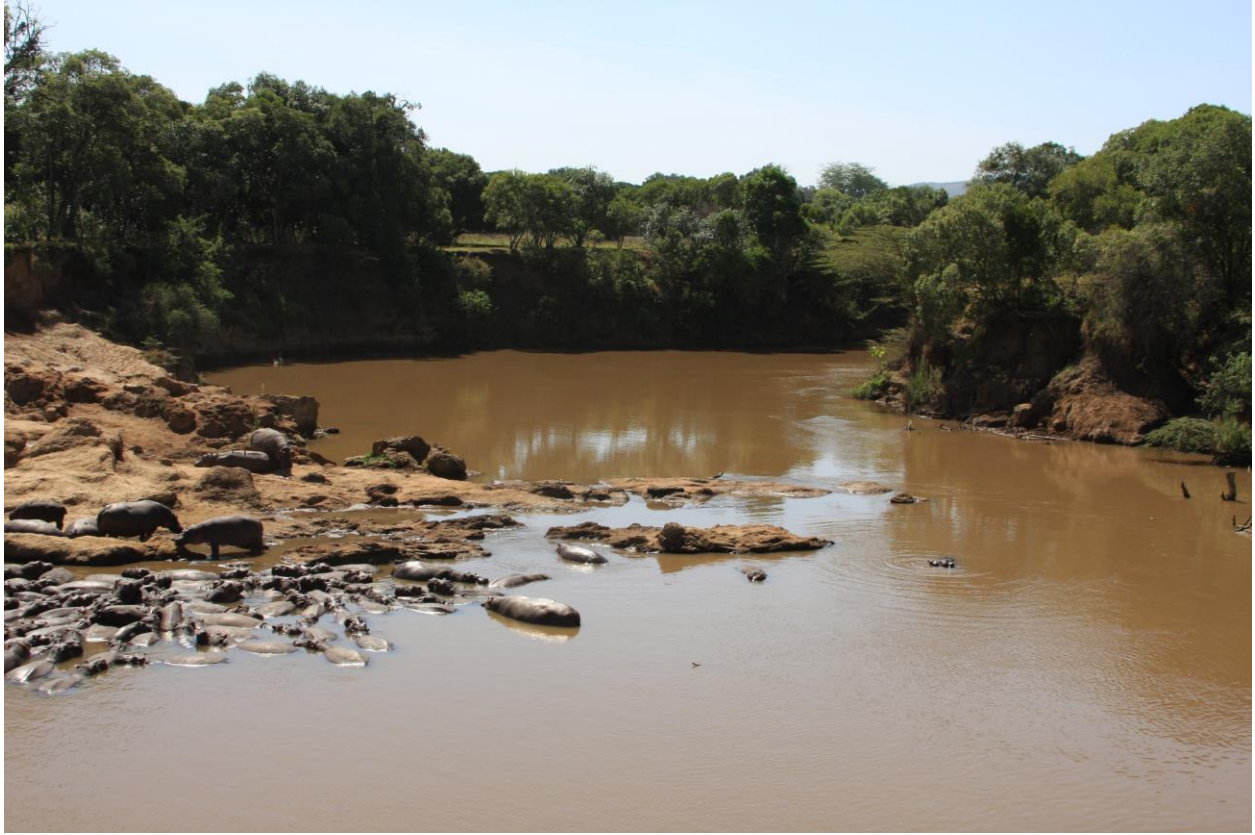

**Supplementary Figure 6.**

Picture of the deeply incised river channel upstream of the Ngerende hippo pool during baseflow (image credit: Christopher Dutton). Picture taken on 07 August 2008 at -1.094, 35.199. Channel is approximately 40 meters wide. The bank is approximately 3-6 meters higher than the river.

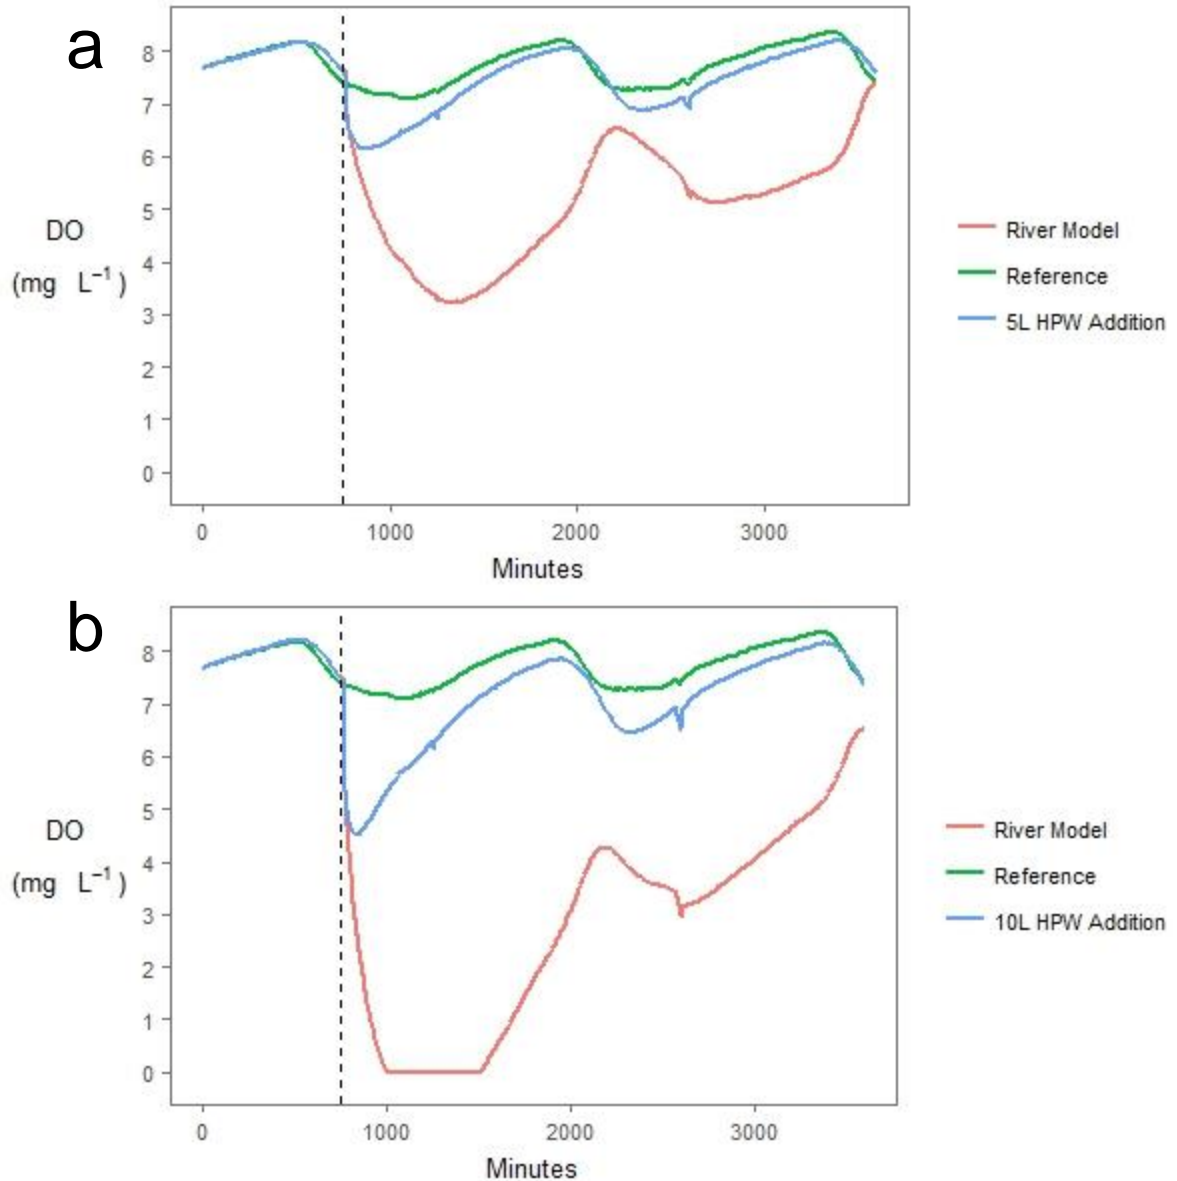

**Supplementary Figure 7.** Model results extrapolating the DO observations in the experimental stream channel to a deeper river channel similar to the Mara River. (a) Results based on addition of 5 L of hippo pool water (HPW) to 55 L of upstream river water; (b) Results based on addition of 10 L of HPW to 50 L of upstream river water. The HPW was added at 745 minutes (dashed line) and took a few minutes to fully mix. The diel periodicity is explained by water temperature, which varied between 14.2-24.4 °C during the experiment; the minimum daily DO concentrations in the experiment coincided with maximum water temperatures.



### Supplementary Table 1.

Details for the 9 fish kills documented between 2009 and 2015.

| Date        | Observed Location | River       | Reported by              | Species                                                                                              |
|-------------|-------------------|-------------|--------------------------|------------------------------------------------------------------------------------------------------|
| 24-Feb-2009 | NMB               | Mara        | Mara Conservancy Rangers | multiple species <sup>1</sup>                                                                        |
| 16-Nov-2009 | NMB               | Mara        | Authors                  | multiple species <sup>1</sup>                                                                        |
| 3-Feb-2011  | OMB to NMB        | Mara        | Mara Conservancy Rangers | <i>Mormyrus kannume</i> , <i>Barbus</i> sp., <i>Clarias gariepinus</i>                               |
| 15-Jun-2011 | NMB               | Mara        | Authors                  | primarily <i>Mormyrus kannume</i>                                                                    |
| 10-Sep-2012 | NMB               | Mara        | Authors                  | multiple species <sup>1</sup>                                                                        |
| 10-Dec-2013 | NMB               | Mara        | Authors                  | <i>Labeo victorinus</i> , <i>Labeobarbus altianalis</i> , <i>Barbus</i> sp., <i>Mormyrus kannume</i> |
| 25-Mar-2014 | Serena pump house | Mara        | Rekero Lodge Guides      | multiple species <sup>1</sup>                                                                        |
| 17-Feb-2015 | NMB               | Talek, Mara | Rekero Lodge Guides      | multiple species <sup>1</sup>                                                                        |
| 28-Mar-2015 | NMB               | Mara        | Authors                  | multiple species <sup>1</sup>                                                                        |

NMB = New Mara Bridge; OMB = Old Mara Bridge.

<sup>1</sup> Multiple fish species were observed but inaccessible for accurate identification.

**Supplementary Table 2.**

Remote controlled boat survey of pools.

| Pool     | Date        | Discharge<br>(m <sup>3</sup> s <sup>-1</sup> ) | # Hippos | Depth<br>(cm) | Average Conductivity (μS cm <sup>-1</sup> ) |         |
|----------|-------------|------------------------------------------------|----------|---------------|---------------------------------------------|---------|
|          |             |                                                |          |               | Surface                                     | Benthos |
| Emarti   | 2-Feb-2015  | 2                                              | 0        | 111           | 347                                         | 1776    |
| Moliband | 23-Jan-2015 | <0.1                                           | 0        | 67            | 300                                         | 382     |
| Amani    | 4-Feb-2015  | <0.1                                           | 13       | 122           | 811                                         | 2788    |
| Croc     | 30-Jan-2015 | 2                                              | 20       | 100           | 424                                         | 1604    |
| HPA      | 30-Jan-2015 | 2                                              | 9        | 106           | 689                                         | 1717    |

**Supplementary Table 3.**

Hydrochemical variables measured in the HPW used in the experiments.

| Origin                                                | Hippopotamus Pool Water (HPW) |                          |
|-------------------------------------------------------|-------------------------------|--------------------------|
|                                                       | Amani                         | PRHP                     |
| Use                                                   | Bottle and Stream Experiments | Pool Flushing Experiment |
| NH <sub>4</sub> <sup>+</sup> -N (µg L <sup>-1</sup> ) | 10632.3                       | 25217.6                  |
| NO <sub>3</sub> <sup>-</sup> -N (µg L <sup>-1</sup> ) | 41.7                          | 29.5                     |
| SRP (µg L <sup>-1</sup> )                             | 176.1                         | 2766.6                   |
| TN (mg L <sup>-1</sup> )                              | 22.3                          | 28.0                     |
| TP (µg L <sup>-1</sup> )                              | 2000.9                        | 3233.8                   |
| DOC (mg L <sup>-1</sup> )                             | 27.3                          | 73.0                     |
| H <sub>2</sub> S (µg L <sup>-1</sup> )                | 12.0                          | 1196.0                   |
| Fe(II) (mg L <sup>-1</sup> )                          | 0.4                           | 0.2                      |
| CO <sub>2</sub> (µmol L <sup>-1</sup> )               | 1051.1                        | 1621.3                   |
| CH <sub>4</sub> (µmol L <sup>-1</sup> )               | 89.1                          | 220.7                    |
| N <sub>2</sub> O (µmol L <sup>-1</sup> )              | 0.0                           | 0.0                      |
| F <sup>-</sup> (mg L <sup>-1</sup> )                  | 1.9                           | 2.2                      |
| Cl <sup>-</sup> (mg L <sup>-1</sup> )                 | 31.9                          | 44.4                     |
| Br <sup>-</sup> (mg L <sup>-1</sup> )                 | 0.2                           | 0.3                      |
| SO <sub>4</sub> <sup>2-</sup> (mg L <sup>-1</sup> )   | 23.7                          | 47.8                     |
| Na <sup>+</sup> (mg L <sup>-1</sup> )                 | 61.9                          | 83.3                     |
| K <sup>+</sup> (mg L <sup>-1</sup> )                  | 51.4                          | 63.3                     |
| Mg <sup>2+</sup> (mg L <sup>-1</sup> )                | 8.7                           | 9.4                      |
| Ca <sup>2+</sup> (mg L <sup>-1</sup> )                | 47.1                          | 51.1                     |
| BOD5 (mg L <sup>-1</sup> )                            | 420.0                         | 993.8                    |

SRP = soluble reactive P; TN = total nitrogen; TP = total phosphorus; DOC = dissolved organic carbon; SpCond = specific conductance, corrected to 25 °C; BOD5 = biological oxygen demand over 5 days.

**Supplementary Table 4.**

Discharge and hydrochemical variables measured during the flood pulse on 27-28 October 2012 at New Mara Bridge. Data from the sonde is presented at the same resolution as data from the water samples captured by the ISCO water sampler.

| Time  | Q<br>(m <sup>3</sup> s <sup>-1</sup> ) | DO<br>(mg L <sup>-1</sup> ) | TSS<br>(mg L <sup>-1</sup> ) | TN<br>(mg L <sup>-1</sup> ) | TP<br>(µg L <sup>-1</sup> ) | DOC<br>(mg L <sup>-1</sup> ) | NH <sub>4</sub> <sup>+</sup> -N<br>(µg L <sup>-1</sup> ) | NO <sub>3</sub> <sup>-</sup> -N<br>(µg L <sup>-1</sup> ) | SRP<br>(µg L <sup>-1</sup> ) | SpCond<br>(µS cm <sup>-1</sup> ) |
|-------|----------------------------------------|-----------------------------|------------------------------|-----------------------------|-----------------------------|------------------------------|----------------------------------------------------------|----------------------------------------------------------|------------------------------|----------------------------------|
| 22:38 | 7.9                                    | 3.26                        | 283                          | 3.0                         | 257                         | 2.72                         | 913                                                      | 710                                                      | 49                           | 144.8                            |
| 23:08 | 12.5                                   | 3.59                        | 215                          | 2.6                         | 239                         | 2.59                         | 737                                                      | 883                                                      | 34                           | 144.7                            |
| 23:38 | 14.6                                   | 5.01                        | 269                          | 2.5                         | 224                         | 3.45                         | 722                                                      | 1010                                                     | 55                           | 127.9                            |
| 0:08  | 19.0                                   | 5.18                        | 398                          | 2.6                         | 256                         | 2.76                         | 553                                                      | 975                                                      | 33                           | 125                              |
| 0:38  | 25.8                                   | 5.03                        | 653                          | 3.0                         | 324                         | 2.65                         | 571                                                      | 993                                                      | 35                           | 125.5                            |
| 1:08  | 31.7                                   | 4.69                        | 999                          | 3.1                         | 413                         | 3.01                         | 255                                                      | 907                                                      | 17                           | 125.2                            |
| 4:08  | 27.1                                   | 1.62                        | 3002                         | 9.2                         | 1325                        | 7.87                         |                                                          | 138                                                      | 19                           | 292.3                            |
| 5:08  | 26.5                                   | 2.89                        | 2915                         | 8.4                         | 1270                        | 5.05                         | 385                                                      | 253                                                      | 29                           | 270.9                            |
| 6:08  | 23.5                                   | 3.99                        | 2881                         | 8.2                         | 1472                        | 4.93                         | 372                                                      | 294                                                      | 9                            | 238.4                            |
| 7:08  | 19.3                                   | 4.41                        | 2541                         | 7.1                         | 1045                        | 4.92                         | 408                                                      | 345                                                      | 10                           | 249.3                            |

Q = discharge; DO = dissolved oxygen; TSS = total suspended sediments; TN = total nitrogen; TP = total phosphorus; SRP = soluble reactive P; DOC = dissolved organic carbon; SpCond = specific conductance, corrected to 25 °C.

**Supplementary Table 5.**

Discharge and hydrochemical variables measured during the flood pulse on December 10, 2013 at New Mara Bridge. Data from the sonde is presented at the same resolution as data from the water samples captured by the ISCO water sampler.

| Time  | Q<br>(m <sup>3</sup> s <sup>-1</sup> ) | DO<br>(mg L <sup>-1</sup> ) | TSS<br>(mg L <sup>-1</sup> ) | TN<br>(mg L <sup>-1</sup> ) | TP<br>(µg L <sup>-1</sup> ) | NH <sub>4</sub> <sup>+</sup> -N<br>(µg L <sup>-1</sup> ) | NO <sub>3</sub> <sup>-</sup> -N<br>(µg L <sup>-1</sup> ) | DOC<br>(mg L <sup>-1</sup> ) | SpCond<br>(µS cm <sup>-1</sup> ) | pH<br>(units) |
|-------|----------------------------------------|-----------------------------|------------------------------|-----------------------------|-----------------------------|----------------------------------------------------------|----------------------------------------------------------|------------------------------|----------------------------------|---------------|
| 6:29  | 13                                     | 4.39                        | 1014                         | 4.5                         | 650                         | 105                                                      | 1088                                                     | 4.1                          | 187                              | 7.83          |
| 6:59  | 28                                     | 1.96                        | 2615                         | 8.6                         | 1231                        | 83                                                       | 731                                                      | 3.5                          | 183                              | 7.8           |
| 7:29  | 32                                     | 0.72                        | 3629                         | 9.7                         | 1365                        | 97                                                       | 732                                                      | 4.1                          | 181                              | 7.09          |
| 7:59  | 35                                     | 0.67                        | 3591                         | 10.0                        | 1409                        | 126                                                      | 714                                                      | 4.3                          | 184                              | 7.1           |
| 8:29  | 35                                     | 0.58                        | 4253                         | 12.4                        | 1661                        | 610                                                      | 357                                                      | 8.7                          | 451                              | 7.12          |
| 8:59  | 35                                     | 0.38                        | 5784                         | 17.9                        | 2531                        | 1170                                                     | 304                                                      | 13.6                         | 800                              | 7.8           |
| 9:59  | 33                                     | 0.64                        | 7786                         | 16.7                        | 2473                        | 799                                                      | 326                                                      | 9.1                          | 678                              | 8.14          |
| 10:59 | 30                                     | 1.08                        | 6839                         | 13.5                        | 1982                        | 553                                                      | 468                                                      | 6.3                          | 377                              | 8.19          |
| 11:59 | 26                                     | 1.68                        | 5993                         | 12.4                        | 1772                        | 445                                                      | 525                                                      | 5.4                          | 280                              | 8.09          |
| 12:59 | 20                                     | 2.44                        | 6109                         | 11.9                        | 1699                        | 428                                                      | 510                                                      | 5.1                          | 232                              | 7.96          |
| 13:59 | 17                                     | 3.15                        | 5256                         | 11.3                        | 1605                        | 400                                                      | 531                                                      | 5.4                          | 199                              | 7.46          |
| 14:59 | 14                                     | 3.7                         | 5140                         | 10.7                        | 1654                        | 379                                                      | 569                                                      | 5.5                          | 181                              | 7.41          |
| 16:26 | 12                                     | 4.29                        | 4265                         | 10.1                        | 1377                        | 365                                                      | 563                                                      | 4.6                          | 164                              | 7.82          |

Q = discharge; DO = dissolved oxygen; TSS = total suspended sediments; TN = total nitrogen; TP = total phosphorus; SRP = soluble reactive P; DOC = dissolved organic carbon; SpCond = specific conductance, corrected to 25 °C.

**Supplementary Table 6.**

Discharge and hydrochemical variables measured during the flood pulse on March 14, 2014 at New Mara Bridge. Data from the sonde is presented at the same resolution as data from the water samples captured by the ISCO water sampler.

| Time  | Q<br>(m <sup>3</sup> s <sup>-1</sup> ) | DO<br>(mg L <sup>-1</sup> ) | TSS<br>(mg L <sup>-1</sup> ) | TN<br>(mg L <sup>-1</sup> ) | TP<br>(µg L <sup>-1</sup> ) | NH <sub>4</sub> -N<br>(µg L <sup>-1</sup> ) | NO <sub>3</sub> -N<br>(µg L <sup>-1</sup> ) | SRP<br>(µg L <sup>-1</sup> ) | DOC<br>(mg L <sup>-1</sup> ) | SpCond<br>(µS cm <sup>-1</sup> ) |
|-------|----------------------------------------|-----------------------------|------------------------------|-----------------------------|-----------------------------|---------------------------------------------|---------------------------------------------|------------------------------|------------------------------|----------------------------------|
| 8:57  | 8                                      | 4                           | 1528                         | 4.6                         | 630                         | 793                                         | 415                                         | 3                            | 9.2                          | 659                              |
| 9:12  | 10                                     | 4.03                        | 1012                         | 4.7                         | 657                         | 226                                         | 200                                         | 3                            | 8.5                          | 638                              |
| 9:27  | 11                                     | 3.68                        | 1637                         | 5.7                         | 837                         | 176                                         | 360                                         | 5                            | 7.5                          | 619                              |
| 9:42  | 14                                     | 3.11                        | 2351                         | 8.5                         | 1213                        | 239                                         | 341                                         | 3                            | 6.6                          | 603                              |
| 9:57  | 14                                     | 2.57                        | 2841                         | 9.0                         | 1265                        | 188                                         | 336                                         | 3                            | 7.5                          | 608                              |
| 10:12 | 15                                     | 1.79                        | 3112                         | 9.5                         | 1367                        | 546                                         | 71                                          | 2                            | 7.6                          | 674                              |
| 10:27 | 19                                     | 1.47                        | 3705                         | 10.0                        | 1553                        | 319                                         | 173                                         | 3                            | 8.4                          | 773                              |
| 10:57 | 26                                     | 0.98                        | 4448                         | 11.0                        | 1649                        | 380                                         | 123                                         | 4                            | 8.7                          | 883                              |
| 11:27 | 39                                     | 0.69                        | 5194                         | 11.8                        | 1767                        | 359                                         | 284                                         | 3                            | 8.3                          | 950                              |
| 11:57 | 48                                     | 0.53                        | 7790                         | 11.0                        | 1777                        | 422                                         | 36                                          | 5                            | 6.2                          | 657                              |
| 12:27 | 61                                     | 0.64                        | 7524                         | 12.2                        | 1926                        | 446                                         | 271                                         | 4                            | 6.1                          | 512                              |
| 12:57 | 63                                     | 0.51                        | 7436                         | 12.9                        | 1957                        | 381                                         | 238                                         | 2                            | 5.8                          | 396                              |
| 13:27 | 73                                     | 0.48                        | 8291                         | 12.6                        | 1977                        | 355                                         | 373                                         | 3                            | 5.2                          | 278                              |
| 13:57 | 77                                     | 1.18                        | 7983                         |                             |                             |                                             |                                             |                              | 4.1                          | 213                              |
| 14:27 | 78                                     | 1.95                        | 6819                         | 10.6                        | 1629                        | 311                                         | 338                                         | 5                            | 3.2                          | 197                              |
| 14:57 | 78                                     | 2.15                        | 6560                         | 9.1                         | 1444                        | 282                                         | 257                                         | 10                           | 4.6                          | 229                              |

Q = discharge; DO = dissolved oxygen; TSS = total suspended sediments; TN = total nitrogen; TP = total phosphorus; SRP = soluble reactive P; DOC = dissolved organic carbon; SpCond = specific conductance, corrected to 25 °C.

**Supplementary Table 7.**

Hydrochemical variables measured in the three treatments at the beginning and end of the bottle experiment (means with standard deviation in italics).

| Treatment                                             | HPW         |              | Hippopotamus Feces |              | Control     |             |
|-------------------------------------------------------|-------------|--------------|--------------------|--------------|-------------|-------------|
|                                                       | 30          | 1680         | 30                 | 1680         | 30          | 1680        |
| DO (mg L <sup>-1</sup> )                              | 5.3         | 0.2          | 6.5                | 1.9          | 6.8         | 6.4         |
|                                                       | <i>0.1</i>  | <i>0</i>     | <i>0.2</i>         | <i>0.4</i>   | <i>0.2</i>  | <i>0.1</i>  |
| H <sub>2</sub> S (μg L <sup>-1</sup> )                | 0           | 0.1          | 3.6                | 0            | 2.3         | 2.5         |
|                                                       | <i>0</i>    | <i>0</i>     | <i>0.4</i>         | <i>0</i>     | <i>0.7</i>  | <i>0</i>    |
| NH <sub>4</sub> <sup>+</sup> -N (μg L <sup>-1</sup> ) | 2142.8      | 2282.7       | 133.7              | 456.4        | 18.5        | 13          |
|                                                       | <i>44.9</i> | <i>101.8</i> | <i>84.5</i>        | <i>315.6</i> | <i>29.5</i> | <i>13.2</i> |
| SRP (μg L <sup>-1</sup> )                             | 10.2        | 180          | 147.3              | 602.2        | 14.2        | 7.4         |
|                                                       | <i>1.6</i>  | <i>14.6</i>  | <i>24.7</i>        | <i>197.6</i> | <i>2.4</i>  | <i>5.5</i>  |
| NO <sub>3</sub> <sup>-</sup> -N (μg L <sup>-1</sup> ) | 9.3         | 4.1          | 15.3               | 15.1         | 0           | 0           |
|                                                       | <i>1.6</i>  | <i>0.4</i>   | <i>18.1</i>        | <i>4.7</i>   | <i>0</i>    | <i>0</i>    |
| CO <sub>2</sub> (μmol L <sup>-1</sup> )               | 45.6        | 53.4         | 31                 | 31.3         | 30          | 24          |
|                                                       | <i>4.2</i>  | <i>1.3</i>   | <i>8.6</i>         | <i>5</i>     | <i>3.2</i>  | <i>2.2</i>  |
| CH <sub>4</sub> (μmol L <sup>-1</sup> )               | 14.2        | 7.7          | 0.3                | 0            | 0           | 0           |
|                                                       | <i>10</i>   | <i>0.9</i>   | <i>1.6</i>         | <i>0</i>     | <i>0</i>    | <i>0</i>    |

**Supplementary Table 8.**

Location, area and approximate volume of 14 hippo pools.

| Hippo Pool            | Location (Latitude, Longitude) | River       | Area (m <sup>2</sup> ) | Approximate Volume (m <sup>3</sup> ) |
|-----------------------|--------------------------------|-------------|------------------------|--------------------------------------|
| PRHP                  | -1.4338861, 35.3499556         | Upper Talek | 960                    | 960                                  |
| Amani                 | -1.29539, 35.205               | Ntiakntiak  | 1400                   | 1400                                 |
| Olare Orok Confluence | -1.41587, 35.09783             | Talek       | 4200                   | 4200                                 |
| Smelly                | -1.40463, 35.10347             | Olare Orok  | 1610                   | 1610                                 |
| Double Cross          | -1.38183, 35.13717             | Ntiakntiak  | 1560                   | 1560                                 |
| Nbig                  | -1.42587, 35.35912             | Upper Talek | 2250                   | 2250                                 |
| Ngerende              | -1.09401, 35.19948             | Mara        | 6000                   | 6000                                 |
| Conservancy           | -1.36837, 34.99061             | Mara        | 4250                   | 4250                                 |
| Croc                  | -1.38198, 35.01229             | Mara        | 6460                   | 6460                                 |
| Falls                 | -1.39032, 35.02396             | Mara        | 5200                   | 5200                                 |
| HPA                   | -1.3931, 35.02828              | Mara        | 3900                   | 3900                                 |
| Serena Picnic         | -1.53826, 35.02628             | Mara        | 4200                   | 4200                                 |
| Big                   | -1.54656, 35.02188             | Mara        | 7918                   | 7918                                 |
| Rocky Crossing        | -1.41828, 35.35728             | Upper Talek | 560                    | 560                                  |



**Supplementary Table 9.**

Kruskal-Wallis test results from the sediment fingerprinting.

| Element | Chi-Squared | Degrees of Freedom | p-value |
|---------|-------------|--------------------|---------|
| P       | 32.52       | 3                  | < 0.001 |
| Na      | 29.7        | 3                  | < 0.001 |
| V       | 25.758      | 3                  | < 0.001 |
| Ti      | 18.673      | 3                  | < 0.001 |
| Ga      | 18.481      | 3                  | < 0.001 |
| Fe      | 17.955      | 3                  | < 0.001 |
| Pb      | 16.538      | 3                  | 0.001   |
| Ni      | 15.992      | 3                  | 0.001   |
| U       | 15.046      | 3                  | 0.002   |
| K       | 14.288      | 3                  | 0.003   |
| Sb      | 14.181      | 3                  | 0.003   |
| Cr      | 10.857      | 3                  | 0.013   |
| Zn      | 10.446      | 3                  | 0.015   |
| Ba      | 10.43       | 3                  | 0.015   |
| Mo      | 9.5327      | 3                  | 0.023   |
| Cu      | 7.4212      | 3                  | 0.060   |

**Supplementary Table 10.**

Step-wise discriminant function analysis results from the sediment fingerprinting.

| Step | Formula                                                              | Cumulative Error % |
|------|----------------------------------------------------------------------|--------------------|
| 1    | U                                                                    | 37%                |
| 2    | U + Na                                                               | 33%                |
| 3    | U + Na + Ga                                                          | 28%                |
| 4    | U + Na + Ga + K                                                      | 15%                |
| 5    | U + Na + Ga + K + Pb                                                 | 11%                |
| 6    | U + Na + Ga + K + Pb + P                                             | 8%                 |
| 7    | U + Na + Ga + K + Pb + P + V                                         | 8%                 |
| 8    | U + Na + Ga + K + Pb + P + V + Zn                                    | 9%                 |
| 9    | U + Na + Ga + K + Pb + P + V + Zn + Ba                               | 9%                 |
| 10   | U + Na + Ga + K + Pb + P + V + Zn + Ba + Mo                          | 9%                 |
| 11   | U + Na + Ga + K + Pb + P + V + Zn + Ba + Mo + Fe                     | 8%                 |
| 12   | U + Na + Ga + K + Pb + P + V + Zn + Ba + Mo + Fe + Ni                | 8%                 |
| 13   | U + Na + Ga + K + Pb + P + V + Zn + Ba + Mo + Fe + Ni + Cr           | 8%                 |
| 14   | U + Na + Ga + K + Pb + P + V + Zn + Ba + Mo + Fe + Ni + Cr + Ti      | 8%                 |
| 16   | U + Na + Ga + K + Pb + P + V + Zn + Ba + Mo + Fe + Ni + Cr + Ti + Sb | 8%                 |

**Supplementary Table 11.**

Confusion matrix for all potential sediment sources in the sediment fingerprinting mixing model.

|             | Hippo | Middle Mara | Talek | Upper Mara | Accuracy |
|-------------|-------|-------------|-------|------------|----------|
| Hippo       | 6     | 0           | 0     | 2          | 87.5%    |
| Middle Mara | 0     | 38          | 1     | 1          | 90.0%    |
| Talek       | 1     | 0           | 8     | 4          | 61.5%    |
| Upper Mara  | 0     | 2           | 1     | 15         | 77.8%    |

### **Supplementary Note 1.**

Further consideration of nutrient patterns during flushing flows.

The changes in nutrient concentrations measured during the three flushing flows with automated samplers varied across flow events. Notably,  $\text{NO}_3^-$  and  $\text{NH}_4^+$  declined with decreasing dissolved oxygen (DO) concentration during the October 2012 and March 2014 flushing flows. During the December 2013 flushing flow, in which a fish kill occurred,  $\text{NH}_4^+$  rose and peaked during the DO decrease.

We would not expect the peak in  $\text{NH}_4^+$  concentration to necessarily be in sync with a decrease in DO because nitrification would quickly consume excess  $\text{NH}_4^+$  with even modest oxygenation, and even anoxic river water still receives oxygen influx from air-water gas exchange. Variation in the hydrological origin and magnitude of each flushing flow would also introduce variation in the DO and nutrient responses<sup>2</sup> (Fig 1b).

Additionally, soluble reactive P (SRP) concentrations were very low and did not show a consistent trend across all three flushing flows, yet we have measured very high concentrations of SRP in pools with hippopotami (Supplementary Table 3). One possibility is that iron oxyhydroxides precipitate upon mixing of anoxic pool water with inflowing river water, and the SRP is removed from solution by sorption, although we lack the measurements necessary to assess that hypothesis<sup>3,4</sup>. Another possibility is that SRP may sorb to clay sediments given the very high sediment loads experienced during the flushing flows (peak TSS concentrations reached as high as  $8000 \text{ mg L}^{-1}$  during the March 2014 flushing flow).

## Supplementary Note 2.

### Modeling downstream oxygen depletion

Diffusive gas exchange between the water and atmosphere was estimated from dissolved gas concentrations using the stagnant film model<sup>5</sup>:

$$F_{areal} = D \left[ \frac{(C_{obs} - C_{eq})}{z} \right] \quad (S1)$$

where  $F_{areal}$  = flux in  $\text{nmol cm}^{-2} \text{s}^{-1}$ ;  $D$  = coefficient of molecular diffusion for the gas in  $\text{cm}^2 \text{s}^{-1}$ ;  $C_{obs}$  = observed dissolved gas concentration in  $\mu\text{M}$  ( $=\text{nmol cm}^{-3}$ );  $C_{eq}$  = gas concentration ( $\mu\text{M}$ ) in equilibrium with the atmosphere; and  $z$  = thickness of the hypothetical boundary layer (cm). Equilibrium DO concentrations (from Henry's Law) and diffusion coefficients were estimated for the measured water temperatures using the empirical relationship in Benson and Krause<sup>6</sup> and the Stokes-Einstein equation, respectively. A reasonable boundary layer thickness ( $z$ ) for flowing water is  $50 \mu\text{m} = 0.0050 \text{ cm}$ . Water column depths: 15 cm in artificial channels, 100 cm in model river.

For time intervals preceding each DO measurement, we estimated the steady-state areal reaeration rate ( $F_{areal}$ ) using the mean of the two temperature and DO measurements (i.e., before and after the interval) in the above equation.

The net DO concentration change in the water ( $\Delta DO_{vol}$ ,  $\mu\text{M s}^{-1}$ ) was estimated from the change in DO concentration ( $\mu\text{M}$ ) during the interval divided by interval time  $t$  in seconds (s):

$$\Delta DO_{vol} = \frac{C_t - C_0}{t} \quad (S2)$$

where  $C_t$  and  $C_0$  are corrected for the reference concentrations ( $C_{obs \text{ reference}}$ ) at each time step.

The  $\Delta DO_{vol}$  was converted to an areal rate ( $\Delta DO_{areal}$ ,  $\text{nmol cm}^{-2} \text{s}^{-1}$ ) as follows, assuming a water depth of 15 cm in the artificial channels:

$$\Delta DO_{areal} = \Delta DO_{vol} * 10^3 \frac{\text{nmol}}{\mu\text{mol}} * 0.015 \frac{\text{L}}{\text{cm}^2} \quad (S3)$$

The gross DO consumption rate on an areal basis ( $R_{areal}$ ,  $\text{nmol cm}^{-2} \text{s}^{-1}$ ) was considered equal to the  $\Delta DO_{areal}$  plus the reaeration rate (both have negative signs when DO is decreasing; effectively we are adding the DO coming in via reaeration):

$$R_{areal} = \Delta DO_{areal} - F_{areal} \quad (S4)$$

This gross DO consumption rate was expressed on a volumetric basis ( $R_{vol}$ ,  $\mu\text{M s}^{-1}$ ) as follows:

$$R_{vol} = R_{areal} * 10^{-3} \frac{\mu mol}{nmol} * \frac{1 cm^2}{0.015 L} \quad (S5)$$

We then applied this rate to the river. In the river model we use  $R_{vol}$  determined above for each time interval.

We predicted the river DO concentration ( $C_{pred}$ ) as follows:

$$R_{areal\ river} = R_{vol} * 10^3 \frac{nmol}{\mu mol} * \frac{0.1 L}{cm^2} \quad (S6)$$

$F_{arealriver}$  was determined using the above equation and the water temperatures and DO concentration at the start of each interval (note that this refers to the  $C_{pred}$  below; we cannot use the mean of before and after each interval because that becomes a circular calculation).

$$\Delta DO_{areal\ river} = R_{areal\ river} - F_{areal\ river} \quad (S7)$$

$$\Delta DO_{vol\ river} = \frac{\Delta DO_{areal\ river}}{10^3 \frac{nmol}{\mu mol} * \frac{0.1 L}{cm^2}} \quad (S8)$$

$$C_{pred} = C_{t-1} + (\Delta DO_{vol\ river} * t) \quad (S9)$$

Once the  $C_{pred}$  reached negative values we considered the water to be anoxic.

### **Supplementary Note 3.**

#### **Sediment fingerprinting statistical method**

Elemental composition data from suspended sediments were used as “downstream” samples in a sediment fingerprinting method along with previously collected source data from throughout the catchment<sup>7</sup>. Additional source samples for Upper Mara, Talek and Hippo were added to the original source signatures to represent a larger range of variability in those three source types (Upper Mara n=18, Talek n=12, Hippo n=8).

To identify the contribution of hippopotamus feces from the pools to downstream suspended sediments during flushing flows, the Kruskal-Wallis H test was first used to identify the elements that showed significant differences between the potential sources<sup>8</sup>. Out of the 16 elements assessed, copper was eliminated due to a p-value greater than 0.05 (Supplementary Table 9). A step-wise Discriminant Function Analysis (DFA) based on the minimization of Wilk’s lambda was then used to determine which combination of elements provided the best discrimination ability for the least number of elements<sup>8-10</sup>. The combination of uranium, sodium, gallium, potassium, lead and phosphorus provide the best discriminatory ability between the potential sources (Supplementary Table 10, cumulative error of 0.08%).

A jackknifed Discriminant Function Analysis (jDFA) was then utilized to provide an assessment of the discriminatory power of the tracers through a cross-validation procedure<sup>9</sup>. The jDFA runs multiple DFAs, leaving a different source out each time and attempting to guess the appropriate source classification for that sample. The jDFA found this combination of elements was able to classify the appropriate sample 86% of the time. Talek was the most poorly identified sample, with 61.5% accuracy (Supplementary Table 11). Talek was often mistaken for Upper Mara. Hippo samples were identified with 87.5% accuracy.

A mixing model (MixSIAR) using Bayesian inference and a Markov Chain Monte Carlo (MCMC) simulation was then utilized to provide the source proportions for each water sample filter<sup>11</sup>. An uninformative prior was utilized. Non-transformed means and standard deviations for the remaining elements that passed all prior statistical tests were input into the model for each of the 4 sources (Upper Mara, Middle Mara, Talek and Hippo). Non-transformed elemental concentrations were then input into the model for each sample. The model was run for 100,000 iterations with the first 50,000 discarded. We report means and 95% credibility intervals. Credibility intervals from a MCMC simulation with an uninformative prior distribution are similar to 95% confidence intervals<sup>12</sup>. The flux of suspended sediments derived from hippopotamus feces was calculated with the proportion estimates from the mixing model and the field measurements of TSS.

#### **Supplementary Note 4.**

##### **Hippo pool water and feces collection**

Hippo pool water (HPW) for the bottle experiment and stream experiment were collected from near the downstream portion of a hippo pool in the benthos of the pool (Amani, -1.29539, 35.205) and pumped into a black HDPE container using a peristaltic pump (6712C Compact Portable Sampler, Teledyne ISCO Lincoln, Nebraska), then sealed with an airtight lid. Samples were taken from Amani and preserved for analysis of H<sub>2</sub>S (total dissolved sulfide), dissolved Fe(II), NH<sub>4</sub><sup>+</sup>-N, SRP, NO<sub>3</sub><sup>-</sup>-N, TN, TP, DOC, dissolved gases (CO<sub>2</sub>, CH<sub>4</sub>, N<sub>2</sub>O) and ions.

HPW for the hippo pool flushing experiment was transported to the reference pool by a truck with two 4000-L water tanks. 8000 L of HPW was pumped from near the bottom of an active hippo pool (Picnic Rock, -1.4338861, 35.3499556) into the water tanks. The truck transported the HPW 1 hour to the reference pool, which may have caused some aeration of the HPW, although it was still anoxic upon arrival. The HPW was then pumped directly into the reference pool. A total of 16,000 L was loaded into the reference pool over two days.

Samples for analysis were taken from the water tanks just prior to loading into the reference pool. The HPW was very high in NH<sub>4</sub><sup>+</sup>-N, SRP, TN, TP, DOC, H<sub>2</sub>S, CO<sub>2</sub>, CH<sub>4</sub>, cations, anions, and BOD<sub>5</sub> (Supplementary Table 3).

Fresh hippopotamus feces were collected early in the morning from several bushes next to a hippo pool and then covered in a plastic container to prevent desiccation. HPW and hippopotamus feces were always collected within several hours of their use.



## Supplementary References.

- 1 Kanga, E. M., Ogutu, J. O., Oloff, H. & Santema, P. Population trend and distribution of the Vulnerable common hippopotamus *Hippopotamus amphibius* in the Mara Region of Kenya. *Oryx* **45**, 20-27, doi:10.1017/s0030605310000931 (2011).
- 2 Conley, D. J. *et al.* Hypoxia-Related Processes in the Baltic Sea. *Environ. Sci. Technol.* **43**, 3412-3420, doi:10.1021/es802762a (2009).
- 3 Hupfer, M. & Lewandowski, J. Oxygen Controls the Phosphorus Release from Lake Sediments – a Long-Lasting Paradigm in Limnology. *International Review of Hydrobiology* **93**, 415-432, doi:10.1002/iroh.200711054 (2008).
- 4 Kraal, P. *et al.* Decoupling between Water Column Oxygenation and Benthic Phosphate Dynamics in a Shallow Eutrophic Estuary. *Environ. Sci. Technol.* **47**, 3114-3121, doi:10.1021/es304868t (2013).
- 5 Liss, P. S. & Slater, P. G. Flux of Gases across the Air-Sea Interface. *Nature* **247**, 181-184, doi:10.1038/247181a0 (1974).
- 6 Benson, B. B. & Krause, D. The concentration and isotopic fractionation of gases dissolved in freshwater in equilibrium with the atmosphere. 1. Oxygen. *Limnology and Oceanography* **25**, 662-671, doi:10.4319/lo.1980.25.4.0662 (1980).
- 7 Dutton, C., Anisfeld, S. & Ernstberger, H. A novel sediment fingerprinting method using filtration: application to the Mara River, East Africa. *Journal of Soils and Sediments*, 1-16, doi:10.1007/s11368-013-0725-z (2013).
- 8 R: A language and environment for statistical computing v. 3.3.1 (R Foundation for Statistical Computing, Vienna, Austria, 2016).
- 9 Venables, W. N. & Ripley, B. D. *Modern applied statistics with S.* (Springer, 2002).
- 10 Weihs, C., Ligges, U., Luebke, K. & Raabe, N. in *Data Analysis and Decision Support* (eds D. Baier, R. Decker, & L. Schmidt-Thieme) 335-343 (Springer-Verlag, 2005).
- 11 MixSIAR GUI User Manual (2013).
- 12 McCarthy, M. A. *Bayesian Methods for Ecology.* (Cambridge University Press, 2007).
